# Supplementary material
Source: MDPI journal article supplement (https://www.mdpi.com/2073-4344/13/3/530)
Supplement: s1 [file s1]

## 1 Products Analysis

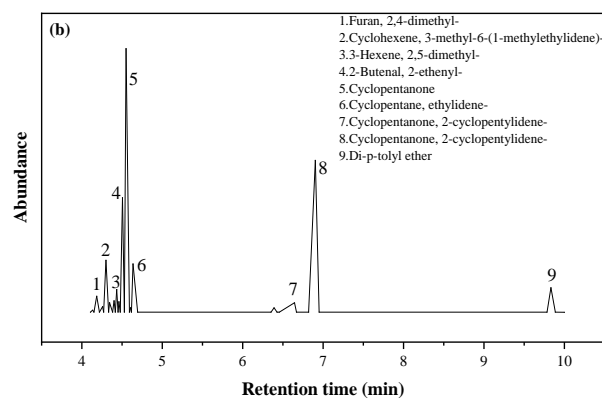

**Figure S1.** Main products and TIC diagram of cyclopentanone condensation reaction on  $\text{SO}_3\text{H}$ -APG catalyst.

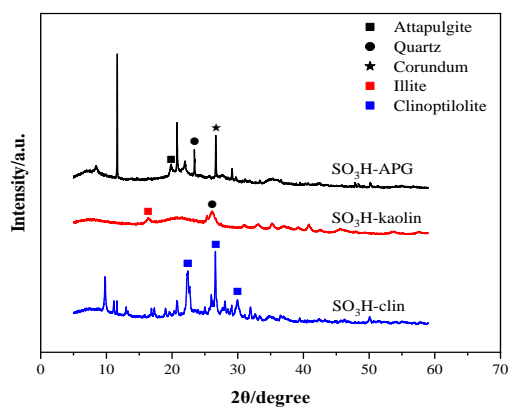

**Figure S2.** XRD patterns of clay-based catalysts.

## 2. Response Surface Methodology (RSM) Analysis

From the results of the path of steepest ascent experiment, the values of each factor were determined as 0 mL, 0.8 mL, 1.6 mL, 2.4 mL and 3.2 mL of -SH group loading; the reaction temperatures were 110 °C, 130 °C, 150 °C, 170 °C and 190 °C, and the reaction times were 2 h, 3 h, 4 h, 5 h and 6 h.

**Table S1.** Optimization of Box-Behnken test factors and levels for C10 yield conditions.

| Factors                                | -1  | 0   | 1   |
|----------------------------------------|-----|-----|-----|
| X <sub>1</sub> -SH loading/ml          | 0   | 1.6 | 3.2 |
| X <sub>2</sub> reaction temperature/°C | 110 | 150 | 190 |
| X <sub>3</sub> reaction time/h         | 2   | 4   | 6   |

**Table S2** Optimization of Box-Behnken test results and analysis for C10 yield conditions.

|    | X1  | X2  | X3 | C10 yield/% |
|----|-----|-----|----|-------------|
| 1  | 0   | 110 | 4  | 26.35       |
| 2  | 3.2 | 110 | 4  | 26.48       |
| 3  | 0   | 190 | 4  | 32.76       |
| 4  | 3.2 | 190 | 4  | 35.68       |
| 5  | 0   | 150 | 2  | 30.03       |
| 6  | 3.2 | 150 | 2  | 31.98       |
| 7  | 0   | 150 | 6  | 34.61       |
| 8  | 3.2 | 150 | 6  | 37.06       |
| 9  | 1.6 | 110 | 2  | 38.36       |
| 10 | 1.6 | 190 | 2  | 30.03       |
| 11 | 1.6 | 110 | 6  | 35.78       |
| 12 | 1.6 | 190 | 6  | 32.41       |
| 13 | 1.6 | 150 | 4  | 59.05       |
| 14 | 1.6 | 150 | 4  | 58.98       |
| 15 | 1.6 | 150 | 4  | 59.03       |
| 16 | 1.6 | 150 | 4  | 59.05       |
| 17 | 1.6 | 150 | 4  | 58.74       |

Using Design expert V8.0.6 software to fit the data in Table S2, the regression equation S1 was obtained.

$$Y = 58.97 + 0.93X_1 + 0.49X_2 + 1.18X_3 + 0.7X_1X_2 + 0.13X_1X_3 + 1.24X_2X_3 - 14.69X_1^2 - 13.96X_2^2 - 10.86X_3^2$$

(Eq. S1)

Analysis of variance was performed on the above regression equation and the results are tabulated in Table S3.

**Table S3** Variance analysis of response surface experiments results.

| Variance Source               | Square Sum | Degrees of Freedom | Mean Square | F-value | P-value | Salience |
|-------------------------------|------------|--------------------|-------------|---------|---------|----------|
| Model                         | 2510.42    | 9                  | 278.9       | 18.48   | 0.0004  | **       |
| X <sub>1</sub>                | 6.94       | 1                  | 6.94        | 0.46    | 0.0396  | *        |
| X <sub>2</sub>                | 1.91       | 1                  | 1.91        | 0.13    | 0.0225  | *        |
| X <sub>3</sub>                | 11.19      | 1                  | 11.19       | 0.74    | 0.0479  | *        |
| X <sub>1</sub> X <sub>2</sub> | 1.95       | 1                  | 1.95        | 0.13    | 0.7302  |          |
| X <sub>1</sub> X <sub>3</sub> | 0.063      | 1                  | 0.063       | 0.0041  | 0.9505  |          |
| X <sub>2</sub> X <sub>3</sub> | 6.15       | 1                  | 6.15        | 0.41    | 0.5436  |          |
| X <sub>1</sub> <sup>2</sup>   | 908.46     | 1                  | 908.46      | 60.17   | 0.0001  | **       |
| X <sub>2</sub> <sup>2</sup>   | 821.00     | 1                  | 821.00      | 54.38   | 0.0002  | **       |
| X <sub>3</sub> <sup>2</sup>   | 496.70     | 1                  | 496.70      | 32.90   | 0.0007  | **       |
| Residual                      | 105.68     | 7                  | 15.10       |         |         |          |
| Proposed item loss            | 105.61     | 3                  | 35.20       | 2029.01 | 0.0591  |          |
| Error term                    | 0.069      | 4                  | 0.017       |         |         |          |
| Sum                           | 2616.10    | 16                 |             |         |         |          |

Note: "\*" indicates a significant effect on the results ( $P < 0.05$ ); "\*\*\*" indicates a highly significant effect on the results ( $P < 0.01$ ).

**Table S4** Ammonia and carbon dioxide desorption activation energy (DAE).

|                          | CO <sub>2</sub> |           | NH <sub>3</sub> |           | E <sub>d</sub> (kJ/mol) |       |
|--------------------------|-----------------|-----------|-----------------|-----------|-------------------------|-------|
|                          | Yang            |           | Hu              |           | E <sub>d</sub> (kJ/mol) |       |
|                          | 0-150°C         | 150-450°C | 0-150°C         | 150-450°C | Yang                    | Hu    |
| APG                      | 9.88            | 36.38     | 12.37           | 36.29     | 25.52                   | 18.34 |
| SO <sub>3</sub> H-APG    | 10.48           | 25.73     | 22.61           | 44.11     | 23.72                   | 20.99 |
| SO <sub>3</sub> H-kaolin | -               | -         | -               | -         | 17.89                   | 24.65 |
| SO <sub>3</sub> H-clin   | -               | -         | -               | -         | 13.72                   | 14.09 |

**Table S5** Physiochemical properties of catalysts.

|                          | CO <sub>2</sub> |           | <i>E<sub>d</sub></i> (kJ/mol) |           | NH <sub>3</sub> | <i>E<sub>d</sub></i> (kJ/mol) |
|--------------------------|-----------------|-----------|-------------------------------|-----------|-----------------|-------------------------------|
|                          |                 |           |                               |           |                 |                               |
|                          | Yang            |           | Hu                            |           |                 |                               |
|                          | 0-150°C         | 150-450°C | 0-150°C                       | 150-450°C | Yang            | Hu                            |
| APG                      | 9.88            | 36.38     | 12.37                         | 36.29     | 25.52           | 18.34                         |
| SO <sub>3</sub> H-APG    | 10.48           | 25.73     | 22.61                         | 44.11     | 23.72           | 20.99                         |
| SO <sub>3</sub> H-kaolin | -               | -         | -                             | -         | 17.89           | 24.65                         |
| SO <sub>3</sub> H-clin   | -               | -         | -                             | -         | 13.72           | 14.09                         |

### 3. Reaction Kinetic Analysis

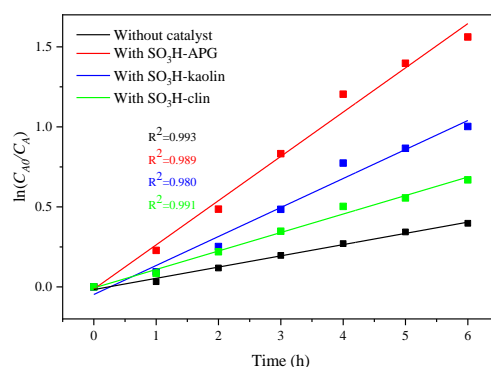**Figure S3.** The kinetic plots for the cyclopentanone aldol condensation.

According to the Arrhenius equation:  $k = k_0 \cdot e^{\left(\frac{E}{RT}\right)}$ , take the logarithm to get  $\ln k = \ln k_0 - \frac{E}{RT}$ , make the graph of  $\ln k - \frac{1}{T}$ , the slope is  $-\frac{E}{R}$  and the intercept is  $\ln k_0$ .

**Table S6** The reaction rate constants  $k$  at different temperatures.

| T/°C                 | 130     | 150     | 170     |
|----------------------|---------|---------|---------|
| $k$                  | 0.5470  | 0.4949  | 0.4677  |
| $\frac{1}{T}/K^{-1}$ | 0.00248 | 0.00236 | 0.00226 |
| $\ln k$              | -0.6033 | -0.7034 | -0.7599 |

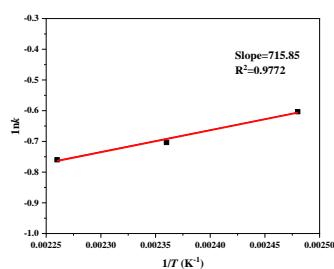**Figure S4.** The Arrhenius equation curve.

From the calculation, we could get  $E = -(715.85) \times 8.314 = 5952 \text{ J/mol}$ ;

$$k_0=0.093.$$

The reaction rate constant was  $k=0.093e^{(-\frac{5952}{RT})}$ , and the reaction rate equation was  $r_A=0.093e^{(-\frac{5952}{RT})}c_A$ .

#### 4. Modelling of cyclopentanone adsorption

Cyclopentanone adsorption on SO<sub>3</sub>H-APG catalyst was simulated by VASP. Sulfur atom got electron from cyclopentanone to build a stable chemisorption that would be conformed via DFT calculation. Adsorption energy  $E_{ad} = E_{tot} - (E_{sub} + E_{mol})$  was computed to determine the strength of reactant molecule adsorbed on the SO<sub>3</sub>H-APG catalyst, where  $E_{tot}$ ,  $E_{sub}$ , and  $E_{mol}$ , referred to the total energy of the combined system, the substrate alone and the adsorbate in the gas phase, respectively. And the  $E_{ad}$  was got as -0.511948 eV which was indicated a exothermal adsorption of cyclopentanone. Electron density increasing of the adsorbate will facilitate its activation and further condensation.

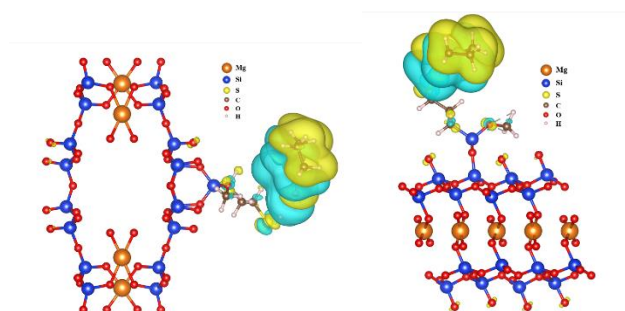

**Figure S5.** Charge density differences of cyclopentanone adsorption on SO<sub>3</sub>H-APG catalyst.

Blue and yellow areas represent electron accumulation and depletion, respectively. Atom

color: S-yellow, C-brown, O-red, and H-white.
